# Supplementary material for: Selection and validation of reference genes for qRT-PCR analysis of gene expression in Microsporum canis growing under different adhesion-inducing conditions
Source: PubMed Central journal article supplement (PMC5775245; doi:10.1038/s41598-018-19680-9), 2018-01-19
Supplement: 41598_2018_19680_MOESM1_ESM.pdf [file 41598_2018_19680_MOESM1_ESM.pdf]

## SUPPLEMENTARY INFORMATIONS

### **Selection and validation of reference genes for qRT-PCR analysis of gene expression in *Microsporium canis* growing under different adhesion-inducing conditions**

Anita Ciesielska\*, Paweł Stączek

Department of Microbial Genetics, Faculty of Biology and Environmental Protection, University of Łódź,  
Banacha 12/16, 90-237 Łódź, Poland

\*Corresponding author: [anita.ciesielska@biol.uni.lodz.pl](mailto:anita.ciesielska@biol.uni.lodz.pl)

#### **TABLE**

**Supplementary Table S1.** Averaged raw  $C_t$  values of the *M. canis* samples in different experimental conditions.

**Table S1.** Averaged raw C<sub>t</sub> values of the *M. canis* samples in different experimental conditions.

| Experimental conditions | <i>β-act</i> | <i>β-tub</i> | <i>adp-<i>rf</i></i> | <i>ef1-α</i> | <i>sdha</i> | <i>rpl2</i> | <i>mbp1</i> | <i>psm1</i> | <i>rGTPa</i> |
|-------------------------|--------------|--------------|----------------------|--------------|-------------|-------------|-------------|-------------|--------------|
| C-24h,28°C              | 15,0816      | 17,8663      | 16,0168              | 16,4336      | 16,0507     | 19,4089     | 18,7353     | 22,8421     | 17,4922      |
| C-48h,28°C              | 16,7397      | 21,1253      | 18,2989              | 19,8562      | 18,1715     | 20,9306     | 20,4721     | 26,2977     | 17,3464      |
| C-72h,28°C              | 15,3093      | 20,5259      | 18,3139              | 17,5091      | 17,5893     | 19,7025     | 19,7365     | 25,2794     | 16,9789      |
| G-24h,28°C              | 15,6827      | 18,8063      | 16,4067              | 17,4261      | 16,5092     | 20,8353     | 19,2533     | 23,1385     | 16,6919      |
| G-48h,28°C              | 17,6641      | 21,5370      | 17,3173              | 19,1357      | 18,4533     | 20,2351     | 20,6511     | 26,6561     | 17,1660      |
| G-72h,28°C              | 15,4841      | 20,8007      | 17,7020              | 17,7954      | 17,8440     | 19,9515     | 19,8217     | 25,4514     | 17,2258      |
| Ker-24h,28°C            | 15,9188      | 19,9406      | 17,2388              | 17,8755      | 17,3716     | 20,1980     | 19,7845     | 24,8051     | 17,1868      |
| Ker-48h,28°C            | 16,7456      | 22,0708      | 17,9580              | 19,8456      | 18,1545     | 22,2683     | 21,2166     | 26,5231     | 18,2382      |
| Ker-72h,28°C            | 18,7026      | 22,5715      | 18,7174              | 21,1279      | 19,8088     | 23,1328     | 22,1256     | 26,0966     | 18,3195      |
| KS-24h,28°C             | 17,0917      | 20,9406      | 18,2715              | 19,1324      | 18,6174     | 22,8633     | 21,0194     | 24,8273     | 18,1798      |
| KS-48h,28°C             | 16,2997      | 19,4097      | 17,8953              | 20,4286      | 16,8764     | 22,8517     | 19,5165     | 23,7266     | 17,0533      |
| KS-72h,28°C             | 17,8767      | 21,5299      | 18,1868              | 20,8875      | 18,7592     | 23,2783     | 21,3891     | 25,8963     | 17,8543      |
| Col-24h,28°C            | 16,1507      | 19,7351      | 17,2014              | 18,0610      | 17,8255     | 21,6905     | 19,9646     | 24,3561     | 17,4721      |
| Col-48h,28°C            | 15,2868      | 19,5621      | 15,9342              | 17,9221      | 16,6321     | 20,1406     | 19,2660     | 24,6989     | 16,6312      |
| Col-72h,28°C            | 17,5518      | 21,0597      | 17,5074              | 19,8285      | 18,3310     | 22,1783     | 20,9918     | 25,6950     | 17,9076      |
| E-24h,28°C              | 16,4378      | 20,4787      | 18,0605              | 18,1672      | 18,4145     | 22,0419     | 20,6815     | 25,3157     | 18,6170      |
| E-48h,28°C              | 17,0030      | 20,3940      | 20,2496              | 20,9746      | 18,0428     | 21,5316     | 20,6362     | 25,6160     | 17,2521      |
| E-72h,28°C              | 17,7627      | 21,1027      | 18,1437              | 20,6481      | 18,4554     | 23,3477     | 21,1107     | 26,1691     | 17,7786      |
| CH-24h,28°C             | 16,9151      | 20,1510      | 18,6663              | 22,4127      | 17,5768     | 21,4116     | 20,7589     | 25,0624     | 18,9790      |
| CH-48h,28°C             | 16,9125      | 20,0182      | 18,9066              | 21,1125      | 17,9020     | 21,3655     | 20,5758     | 25,4995     | 17,3631      |
| CH-72h,28°C             | 17,2627      | 20,9555      | 17,5924              | 19,5317      | 17,8596     | 21,8061     | 20,6294     | 25,2594     | 17,4488      |
| 5Y-17h, 37°C            | 17,1928      | 21,2574      | 17,9310              | 19,2751      | 18,7825     | 22,1538     | 21,6058     | 25,4353     | 16,8214      |
| 8Y-17h,37°C             | 17,6927      | 21,7832      | 18,1159              | 19,3595      | 19,7826     | 22,4862     | 22,1890     | 26,0458     | 18,1632      |
| 10Y-17h,37°C            | 17,4187      | 21,0490      | 17,8458              | 19,4211      | 19,2702     | 22,1799     | 21,5811     | 25,3638     | 17,5222      |
| 5M-17h,37°C             | 16,3326      | 20,0034      | 17,1083              | 18,1658      | 17,7268     | 21,0094     | 20,8181     | 24,8594     | 17,4035      |
| 8M-17h,37°C             | 17,0149      | 20,9796      | 18,16168             | 21,0196      | 18,6791     | 21,9383     | 21,3397     | 25,0264     | 17,3173      |
| 10M-17h,37°C            | 17,6266      | 21,5597      | 18,19993             | 21,5997      | 19,2398     | 21,6265     | 21,3499     | 26,3299     | 18,0593      |
| KSM-24h,28°C            | 17,0920      | 22,0952      | 17,66209             | 20,8926      | 18,7673     | 24,3728     | 20,6387     | 26,4526     | 16,4423      |
| KSM-48h,28°C            | 16,4392      | 22,0064      | 18,82971             | 19,0363      | 18,9923     | 25,2676     | 20,1296     | 24,7893     | 17,3724      |
| KSM-72h,28°C            | 15,7516      | 22,0205      | 17,82068             | 17,8888      | 18,6402     | 22,5988     | 19,9818     | 24,4985     | 16,5025      |

C-MM-Cove medium (control medium); G-MM-Cove+glucose; Ker-MM-Cove+keratin; KS-MM-Cove+keratin/soy protein; Col-MM-Cove+collagen; E-MM-Cove+elastin; CH-MM-Cove+colloidal chitin; 5Y-YEM Low Pi medium pH 5.0; 8Y-YEM Low Pi medium pH 8.0; 10Y-YEM Low Pi medium pH 10.0; 5M-MM-Cove LowPi medium pH 5.0; 8M-MM-Cove LowPi medium pH 8.0; 10M-MM-Cove LowPi medium pH 10.0, KSM-Keratinocyte-SFM medium.
